# Supplementary material for: Measuring Pb, Th, and U inter-element ratios in geological materials using extreme ultraviolet laser ablation and ionization mass spectrometry
Source: Royal Society of Chemistry journal article supplement (doi:10.1039/d2ja00194b), 2022-01-01
Supplement: d2ja00194b1.pdf [file d2ja00194b1.pdf]

**†Supporting information**

**Measuring Pb, Th, and U inter-element ratios in geological materials using extreme ultraviolet laser ablation and ionization mass spectrometry**

Lydia A. Rush<sup>a\*</sup>, Andrew M. Duffin<sup>b</sup> and Carmen S. Menoni<sup>a</sup>

*<sup>a</sup>Department of Electrical and Computer Engineering, Colorado State University, Fort Collins, CO 80523, USA*

*<sup>b</sup>National Security Directorate, Pacific Northwest National Laboratory, Richland, WA 99352, USA*

*\*Corresponding author: lrush@colostate.edu, Tel: +1 970 4918519*

**Table S1** Expected/literature mass fractions (in  $\mu\text{g/g}$ ) of Pb, Th, and U and their respective 1 standard deviation ( $\pm 1\text{SD}$ ) uncertainties for the samples investigated in this study. The mass fractions and their associated uncertainties listed for the synthetic glasses (NIST610, USGS GSE-1G and STDP5) and iron manganese (FeMnOx-1) material were used to calculate the  $^{206}\text{Pb}/^{238}\text{U}$  and  $^{232}\text{Th}/^{238}\text{U}$  ratio values found in the main text in Table 1. (Mass fractions for most samples can be found in the GeoRem Database: <http://georem.mpch-mainz.gwdg.de/>; mass fraction measurements for SR1, EA, 14971, SL-B, Mogok 2A, Mogok 2C, and Mogok 1 were directly provided by the USGS and are readily available to readers upon request via the corresponding author's email address).

| Sample      | Pb <sub>total</sub> | $\pm 1\text{SD}$ | $^{206}\text{Pb}$ | $\pm 1\text{SD}$ | $^{232}\text{Th}$ | $\pm 1\text{SD}$ | U <sub>total</sub> | $\pm 1\text{SD}$ | $^{238}\text{U}$ | $\pm 1\text{SD}$ |
|-------------|---------------------|------------------|-------------------|------------------|-------------------|------------------|--------------------|------------------|------------------|------------------|
| NIST610     | 426                 | 1                | 102.7*            | 0.2              | 457.2             | 1.2              | 461.5              | 1.1              | 460.4            | 1.1              |
| USGS GSE-1G | 378                 | 12               | 91*               | 3                | 380               | 20               | 420                | 30               | 417*             | 30               |
| STDP5       | 1414                | 61.5             | 341*              | 15               | 1235              | 133              | 1378               | 5                | 1368*            | 5                |
| FeMnOx-1    | 1624                | 280              | 391*              | 67               | 534               | 40               | 547                | 17               | 543*             | 17               |
| SR1         | n/a                 | n/a              | 218**             | 3                | 185               | 4                | n/a                | n/a              | 2455             | 35               |
| EA          | n/a                 | n/a              | 70**              | 1                | 292               | 8                | n/a                | n/a              | 803              | 15               |
| 14971       |                     |                  |                   |                  |                   |                  |                    |                  |                  |                  |
| LA ICP-MS   | n/a                 | n/a              | 173*              | 3                | 37819             | 2404             | n/a                | n/a              | 1141             | 22               |
| ID-TIMS     | 1904                | 94               | 238               | 13               | 41914             | 2335             | 1580               | 90               | 1569             | 89               |
| Bananeira†  | n/a                 | n/a              | 243               | 40               | 68252             | 5574             | n/a                | n/a              | 972              | 179              |
| Diamantina† | n/a                 | n/a              | 93                | 11               | 3588              | 1822             | n/a                | n/a              | 355              | 41               |
| SL-B        | n/a                 | n/a              | 29688**           | 618              | 543556            | 7088             | n/a                | n/a              | 277039           | 5732             |
| Mogok 2A    | n/a                 | n/a              | 3735**            | 25               | 528320            | 2270             | n/a                | n/a              | 341808           | 2266             |
| Mogok 2C    | n/a                 | n/a              | 4716**            | 46               | 418880            | 4480             | n/a                | n/a              | 450034           | 4421             |
| Mogok 1     | n/a***              | n/a              | n/a***            | n/a              | 24310             | 2101             | n/a                | n/a              | 290841           | 3683             |

\*Calculated  $^{206}\text{Pb}$  and  $^{238}\text{U}$  mass fractions from total Pb and U content, respectively, assuming natural isotopic abundance. (Note: The  $^{206}\text{Pb}/^{208}\text{Pb}$  ratio has been measured for USGS GSE-1G using LA ICP-MS and SIMS, obtaining a ratio value of approximately 1.96,<sup>1,2</sup> whereas the natural  $^{206}\text{Pb}/^{208}\text{Pb}$  ratio is 2.17. Nonetheless, the natural Pb abundance was assumed here because the measured isotope abundance was not directly available)

\*\*Calculated radiogenic Pb mass fractions from direct ratio measurements of  $^{206}\text{Pb}/^{238}\text{U}$  and mass fraction measurements of  $^{238}\text{U}$

\*\*\*Sample has too high common Pb to give calculated Pb content

†Mass fraction values measured with LA Q-ICP-MS<sup>3,4</sup>

**Table S2** The ion counts of  $^{206}\text{Pb}$ ,  $^{232}\text{Th}$ ,  $^{238}\text{U}$ ,  $^{232}\text{Th}^{16}\text{O}$ ,  $^{238}\text{U}^{16}\text{O}$ ,  $^{232}\text{Th}^{16}\text{O}_2$ , and  $^{238}\text{U}^{16}\text{O}_2$  measured with the EUV TOF in each super crater ablated on the samples analyzed in this study. The corresponding Pb/U and Th/U ratios for each super crater with its  $\pm 2\sigma$  uncertainty is also listed, where the ratio considers all oxide species detected in the super crater, unless otherwise specified. The weighted average of the Pb/U and Th/U ratios is also shown alongside the  $\pm 2\sigma$  uncertainty, which is calculated using the equations in Table S3.

**Sample: NIST 610 (silicate glass)**

| Super crater #                    | <i>Measured Counts</i> |                   |                  |                                |                               |                                  |                                 | <i>Measured Ratios</i> |               |             |               |
|-----------------------------------|------------------------|-------------------|------------------|--------------------------------|-------------------------------|----------------------------------|---------------------------------|------------------------|---------------|-------------|---------------|
|                                   | $^{206}\text{Pb}$      | $^{232}\text{Th}$ | $^{238}\text{U}$ | $^{232}\text{Th}^{16}\text{O}$ | $^{238}\text{U}^{16}\text{O}$ | $^{232}\text{Th}^{16}\text{O}_2$ | $^{238}\text{U}^{16}\text{O}_2$ | Pb/U                   | $\pm 2\sigma$ | Th/U        | $\pm 2\sigma$ |
| 1*                                | 58                     | 316               | 250              | 274                            | 264                           | n/a                              | 60                              | 0.101                  | 0.03          | 1.03        | 0.17          |
| 2*                                | 55                     | 332               | 278              | 304                            | 284                           | n/a                              | 62                              | 0.089                  | 0.03          | 1.02        | 0.17          |
| 3*                                | 64                     | 249               | 191              | 240                            | 208                           | n/a                              | 59                              | 0.140                  | 0.04          | 1.07        | 0.20          |
| 4*                                | 77                     | 322               | 243              | 307                            | 280                           | n/a                              | 47                              | 0.136                  | 0.04          | 1.10        | 0.19          |
| 5*                                | 83                     | 377               | 336              | 286                            | 270                           | n/a                              | 69                              | 0.123                  | 0.03          | 0.98        | 0.15          |
| 6*                                | 82                     | 408               | 324              | 276                            | 258                           | n/a                              | 66                              | 0.127                  | 0.03          | 1.06        | 0.16          |
| 7                                 | 44                     | 174               | 90               | 193                            | 167                           | n/a                              | 78                              | 0.131                  | 0.05          | 1.10        | 0.24          |
| 8                                 | 44                     | 119               | 59               | 147                            | 148                           | n/a                              | 68                              | 0.161                  | 0.06          | 0.97        | 0.27          |
| 9                                 | 44                     | 113               | 90               | 136                            | 125                           | n/a                              | 81                              | 0.149                  | 0.05          | 0.84        | 0.22          |
| 10                                | 47                     | 97                | 88               | 100                            | 94                            | n/a                              | 68                              | 0.189                  | 0.07          | 0.79        | 0.23          |
| 11                                | 44                     | 71                | 67               | 111                            | 98                            | n/a                              | 77                              | 0.184                  | 0.07          | 0.75        | 0.25          |
| 12                                | 39                     | 52                | 50               | 63                             | 78                            | n/a                              | 69                              | 0.200                  | 0.08          | 0.58        | 0.24          |
| 13                                | 42                     | 42                | 49               | 68                             | 57                            | n/a                              | 53                              | 0.267                  | 0.11          | 0.70        | 0.31          |
| 14*                               | 127                    | 729               | 651              | 539                            | 479                           | n/a                              | 66                              | 0.106                  | 0.02          | 1.06        | 0.12          |
| 15*                               | 133                    | 724               | 628              | 489                            | 480                           | n/a                              | 74                              | 0.112                  | 0.02          | 1.02        | 0.12          |
| 16*                               | 137                    | 662               | 555              | 485                            | 483                           | n/a                              | 77                              | 0.123                  | 0.03          | 1.03        | 0.12          |
| 17*                               | 167                    | 906               | 809              | 676                            | 693                           | n/a                              | 126                             | 0.102                  | 0.02          | 0.97        | 0.09          |
| 18*                               | 168                    | 809               | 764              | 637                            | 619                           | n/a                              | 119                             | 0.112                  | 0.02          | 0.96        | 0.09          |
| 19*                               | 169                    | 849               | 726              | 707                            | 654                           | n/a                              | 122                             | 0.113                  | 0.02          | 1.04        | 0.10          |
| <i>Weighted average of ratios</i> |                        |                   |                  |                                |                               |                                  |                                 | <b>0.112</b>           | <b>0.007</b>  | <b>0.99</b> | <b>0.03</b>   |

\*Values used in the calculation of the Pb/U weighted average ratio because these runs have total U counts >400.

### Sample: USGS GSE-1G (basalt glass)

| Super crater #                    | <i>Measured Counts</i> |                   |                  |                                   |                                  |                                                |                                               | <i>Measured Ratios</i> |             |             |             |
|-----------------------------------|------------------------|-------------------|------------------|-----------------------------------|----------------------------------|------------------------------------------------|-----------------------------------------------|------------------------|-------------|-------------|-------------|
|                                   | <sup>206</sup> Pb      | <sup>232</sup> Th | <sup>238</sup> U | <sup>232</sup> Th <sup>16</sup> O | <sup>238</sup> U <sup>16</sup> O | <sup>232</sup> Th <sup>16</sup> O <sub>2</sub> | <sup>238</sup> U <sup>16</sup> O <sub>2</sub> | Pb/U                   | ±2σ         | Th/U        | ±2σ         |
| 1                                 | 195                    | 919               | 955              | 785                               | 779                              | n/a                                            | 136                                           | 0.104                  | 0.02        | 0.91        | 0.08        |
| 2                                 | 234                    | 942               | 1078             | 809                               | 785                              | n/a                                            | 174                                           | 0.115                  | 0.02        | 0.86        | 0.07        |
| 3                                 | 228                    | 954               | 981              | 760                               | 794                              | n/a                                            | 175                                           | 0.117                  | 0.02        | 0.88        | 0.07        |
| <i>Weighted average of ratios</i> |                        |                   |                  |                                   |                                  |                                                |                                               | <b>0.11</b>            | <b>0.01</b> | <b>0.88</b> | <b>0.04</b> |

### Sample: STDP5 (phosphate glass)

| Super crater #                    | <i>Measured Counts</i> |                   |                  |                                   |                                  |                                                |                                               | <i>Measured Ratios</i> |              |             |             |
|-----------------------------------|------------------------|-------------------|------------------|-----------------------------------|----------------------------------|------------------------------------------------|-----------------------------------------------|------------------------|--------------|-------------|-------------|
|                                   | <sup>206</sup> Pb      | <sup>232</sup> Th | <sup>238</sup> U | <sup>232</sup> Th <sup>16</sup> O | <sup>238</sup> U <sup>16</sup> O | <sup>232</sup> Th <sup>16</sup> O <sub>2</sub> | <sup>238</sup> U <sup>16</sup> O <sub>2</sub> | Pb/U                   | ±2σ          | Th/U        | ±2σ         |
| 1                                 | 420                    | 1585              | 1347             | 1375                              | 1411                             | n/a                                            | 477                                           | 0.13                   | 0.01         | 0.91        | 0.05        |
| 2                                 | 386                    | 1539              | 1227             | 1401                              | 1373                             | n/a                                            | 498                                           | 0.12                   | 0.01         | 0.95        | 0.06        |
| 3                                 | 414                    | n/a*              | 1281             | 1350                              | 1409                             | n/a                                            | 468                                           | 0.13                   | 0.01         | n/a         | n/a         |
| 4                                 | 662                    | 2456              | 2289             | 1817                              | 1779                             | n/a                                            | 353                                           | 0.15                   | 0.01         | 0.97        | 0.05        |
| 5                                 | 393                    | 1179              | 995              | 1013                              | 992                              | n/a                                            | 365                                           | 0.17                   | 0.02         | 0.93        | 0.06        |
| 6                                 | 309                    | 1006              | 945              | 986                               | 926                              | n/a                                            | 347                                           | 0.14                   | 0.02         | 0.90        | 0.07        |
| <i>Weighted average of ratios</i> |                        |                   |                  |                                   |                                  |                                                |                                               | <b>0.138</b>           | <b>0.006</b> | <b>0.94</b> | <b>0.04</b> |

\*<sup>232</sup>Th signal could not be resolved from ringing induced by a large peak at m/z = 231

### Sample: FeMnOx-1 (iron manganese oxide powder)

| Super crater #                    | <i>Measured Counts</i> |                   |                  |                                   |                                  |                                                |                                               | <i>Measured Ratios</i> |             |             |             |
|-----------------------------------|------------------------|-------------------|------------------|-----------------------------------|----------------------------------|------------------------------------------------|-----------------------------------------------|------------------------|-------------|-------------|-------------|
|                                   | <sup>206</sup> Pb      | <sup>232</sup> Th | <sup>238</sup> U | <sup>232</sup> Th <sup>16</sup> O | <sup>238</sup> U <sup>16</sup> O | <sup>232</sup> Th <sup>16</sup> O <sub>2</sub> | <sup>238</sup> U <sup>16</sup> O <sub>2</sub> | Pb/U                   | ±2σ         | Th/U        | ±2σ         |
| 1                                 | 674                    | 1228              | 1165             | 462                               | 426                              | n/a                                            | n/a                                           | 0.42                   | 0.04        | 1.06        | 0.07        |
| 2                                 | 500                    | 831               | 717              | 439                               | 378                              | n/a                                            | n/a                                           | 0.46                   | 0.04        | 1.16        | 0.10        |
| 3                                 | 399                    | 703               | 656              | 429                               | 356                              | n/a                                            | n/a                                           | 0.39                   | 0.04        | 1.12        | 0.10        |
| <i>Weighted average of ratios</i> |                        |                   |                  |                                   |                                  |                                                |                                               | <b>0.42</b>            | <b>0.02</b> | <b>1.10</b> | <b>0.05</b> |

### Sample: SR1 (zircon)

| Super crater #                    | <i>Measured Counts</i> |                    |                  |                                   |                                  |                                                |                                               | <i>Measured Ratios</i> |              |              |              |
|-----------------------------------|------------------------|--------------------|------------------|-----------------------------------|----------------------------------|------------------------------------------------|-----------------------------------------------|------------------------|--------------|--------------|--------------|
|                                   | <sup>206</sup> Pb      | <sup>232</sup> Th* | <sup>238</sup> U | <sup>232</sup> Th <sup>16</sup> O | <sup>238</sup> U <sup>16</sup> O | <sup>232</sup> Th <sup>16</sup> O <sub>2</sub> | <sup>238</sup> U <sup>16</sup> O <sub>2</sub> | Pb/U                   | ±2σ          | Th/U         | ±2σ          |
| 1                                 | 500                    | Interf.            | 4865             | 492                               | 6179                             | n/a                                            | 2396                                          | 0.037                  | 0.003        | 0.080        | 0.007        |
| 2                                 | 431                    | Interf.            | 3706             | 385                               | 5481                             | n/a                                            | 2058                                          | 0.038                  | 0.004        | 0.070        | 0.007        |
| 3                                 | 414                    | Interf.            | 2669             | 338                               | 4667                             | n/a                                            | 1919                                          | 0.045                  | 0.004        | 0.072        | 0.008        |
| <i>Weighted average of ratios</i> |                        |                    |                  |                                   |                                  |                                                |                                               | <b>0.039</b>           | <b>0.002</b> | <b>0.074</b> | <b>0.004</b> |

\*<sup>232</sup>Th signal had interference (interf.) from <sup>92</sup>Zr<sub>2</sub><sup>16</sup>O<sub>3</sub> at m/z = 232, so only <sup>232</sup>Th<sup>16</sup>O and <sup>238</sup>U<sup>16</sup>O signals are used for the Th/U ratio

### Sample: EA (zircon)

| Super crater #                    | <i>Measured Counts</i> |                     |                    |                                   |                                  |                                                |                                                   | <i>Measured Ratios</i> |            |             |             |
|-----------------------------------|------------------------|---------------------|--------------------|-----------------------------------|----------------------------------|------------------------------------------------|---------------------------------------------------|------------------------|------------|-------------|-------------|
|                                   | <sup>206</sup> Pb*     | <sup>232</sup> Th** | <sup>238</sup> U** | <sup>232</sup> Th <sup>16</sup> O | <sup>238</sup> U <sup>16</sup> O | <sup>232</sup> Th <sup>16</sup> O <sub>2</sub> | <sup>238</sup> U <sup>16</sup> O <sub>2</sub> *** | Pb/U                   | ±2σ        | Th/U        | ±2σ         |
| 1                                 | n/a                    | Interf.             | Intef.             | 235                               | 729                              | n/a                                            | 472                                               | n/a                    | n/a        | 0.32        | 0.05        |
| 2                                 | n/a                    | Interf.             | Interf.            | 241                               | 671                              | n/a                                            | 502                                               | n/a                    | n/a        | 0.36        | 0.05        |
| 3                                 | n/a                    | Interf.             | Interf.            | 177                               | 577                              | n/a                                            | 457                                               | n/a                    | n/a        | 0.31        | 0.05        |
| <i>Weighted average of ratios</i> |                        |                     |                    |                                   |                                  |                                                |                                                   | <b>n/a</b>             | <b>n/a</b> | <b>0.33</b> | <b>0.03</b> |

\*<sup>206</sup>Pb was below EUV TOF detection limits; \*\*<sup>232</sup>Th signal had interference (interf.) from <sup>92</sup>Zr<sub>2</sub><sup>16</sup>O<sub>3</sub> and <sup>238</sup>U had interference from <sup>94</sup>Zr<sup>96</sup>Zr<sup>16</sup>O<sub>3</sub>;\*\*\*<sup>238</sup>U<sup>16</sup>O<sub>2</sub> was not used for any ratio measurements, but the detected ion counts are shown here for reference.

### Sample: 14971 (monazite)

| Super crater #                    | <i>Measured Counts</i> |                   |                  |                                   |                                  |                                                |                                               | <i>Measured Ratios</i> |              |             |            |
|-----------------------------------|------------------------|-------------------|------------------|-----------------------------------|----------------------------------|------------------------------------------------|-----------------------------------------------|------------------------|--------------|-------------|------------|
|                                   | <sup>206</sup> Pb      | <sup>232</sup> Th | <sup>238</sup> U | <sup>232</sup> Th <sup>16</sup> O | <sup>238</sup> U <sup>16</sup> O | <sup>232</sup> Th <sup>16</sup> O <sub>2</sub> | <sup>238</sup> U <sup>16</sup> O <sub>2</sub> | Pb/U                   | ±2σ          | Th/U        | ±2σ        |
| 1                                 | 118                    | 27041             | 806              | 15320                             | 486                              | 258                                            | 325                                           | 0.07                   | 0.01         | 26.4        | 1          |
| 2                                 | 94                     | 17317             | 505              | 10739                             | 372                              | 219                                            | 268                                           | 0.08                   | 0.02         | 24.7        | 1          |
| 3                                 | 92                     | 25344             | 677              | 13107                             | 408                              | 162                                            | 180                                           | 0.07                   | 0.02         | 30.5        | 1          |
| 4                                 | 96                     | 25481             | 779              | 12833                             | 409                              | 152                                            | 164                                           | 0.07                   | 0.02         | 28.4        | 1          |
| 5                                 | 83                     | 23818             | 826              | 11972                             | 420                              | 141                                            | 129                                           | 0.06                   | 0.01         | 26.1        | 1          |
| <i>Weighted average of ratios</i> |                        |                   |                  |                                   |                                  |                                                |                                               | <b>0.071</b>           | <b>0.007</b> | <b>26.8</b> | <b>0.5</b> |

### Sample: Bananeira (monazite)

| Super crater #                    | <i>Measured Counts</i> |                   |                  |                                   |                                  |                                                |                                               | <i>Measured Ratios</i> |              |             |            |
|-----------------------------------|------------------------|-------------------|------------------|-----------------------------------|----------------------------------|------------------------------------------------|-----------------------------------------------|------------------------|--------------|-------------|------------|
|                                   | <sup>206</sup> Pb      | <sup>232</sup> Th | <sup>238</sup> U | <sup>232</sup> Th <sup>16</sup> O | <sup>238</sup> U <sup>16</sup> O | <sup>232</sup> Th <sup>16</sup> O <sub>2</sub> | <sup>238</sup> U <sup>16</sup> O <sub>2</sub> | Pb/U                   | ±2σ          | Th/U        | ±2σ        |
| 1                                 | 87                     | 57923             | 1661             | 28233                             | 848                              | 195                                            | 176                                           | 0.032                  | 0.007        | 32.2        | 1          |
| 2                                 | 86                     | 59232             | 1640             | 28013                             | 904                              | 171                                            | 139                                           | 0.032                  | 0.007        | 32.6        | 1          |
| 3                                 | 74                     | 57971             | 1703             | 28931                             | 897                              | 163                                            | 173                                           | 0.027                  | 0.007        | 31.4        | 1          |
| <i>Weighted average of ratios</i> |                        |                   |                  |                                   |                                  |                                                |                                               | <b>0.030</b>           | <b>0.004</b> | <b>32.0</b> | <b>0.7</b> |

### Sample: Diamantina-1 (monazite)

| Super crater #                    | <i>Measured Counts</i> |                   |                  |                                   |                                  |                                                |                                               | <i>Measured Ratios</i> |              |             |             |
|-----------------------------------|------------------------|-------------------|------------------|-----------------------------------|----------------------------------|------------------------------------------------|-----------------------------------------------|------------------------|--------------|-------------|-------------|
|                                   | <sup>206</sup> Pb      | <sup>232</sup> Th | <sup>238</sup> U | <sup>232</sup> Th <sup>16</sup> O | <sup>238</sup> U <sup>16</sup> O | <sup>232</sup> Th <sup>16</sup> O <sub>2</sub> | <sup>238</sup> U <sup>16</sup> O <sub>2</sub> | Pb/U                   | ±2σ          | Th/U*       | ±2σ         |
| 1                                 | 43                     | 1346              | 868              | 660                               | 414                              | n/a                                            | n/a                                           | 0.03                   | 0.01         | 1.6         | 0.1         |
| 2                                 | 55                     | 1800              | 911              | 966                               | 506                              | n/a                                            | n/a                                           | 0.04                   | 0.01         | 2.0         | 0.1         |
| 3                                 | 77                     | 1633              | 923              | 845                               | 505                              | n/a                                            | n/a                                           | 0.05                   | 0.01         | 1.7         | 0.1         |
| <i>Weighted average of ratios</i> |                        |                   |                  |                                   |                                  |                                                |                                               | <b>0.041</b>           | <b>0.006</b> | <b>1.74</b> | <b>0.06</b> |

\*Measured Th/U ratio is shown here only for reference because Th content is not homogenous in this sample (i.e., ID-TIMS measures Th/U ranging from 0.22 to 16.2)

### Sample: SL-B (uraninite)

| Super crater #                    | <i>Measured Counts</i> |                   |                  |                                   |                                  |                                                |                                               | <i>Measured Ratios</i> |             |              |              |
|-----------------------------------|------------------------|-------------------|------------------|-----------------------------------|----------------------------------|------------------------------------------------|-----------------------------------------------|------------------------|-------------|--------------|--------------|
|                                   | <sup>206</sup> Pb      | <sup>232</sup> Th | <sup>238</sup> U | <sup>232</sup> Th <sup>16</sup> O | <sup>238</sup> U <sup>16</sup> O | <sup>232</sup> Th <sup>16</sup> O <sub>2</sub> | <sup>238</sup> U <sup>16</sup> O <sub>2</sub> | Pb/U                   | ±2σ         | Th/U         | ±2σ          |
| 1                                 | 23200                  | 504047            | 297496           | 295621                            | 142027                           | 2074                                           | 51837                                         | 0.0472                 | 6E-4        | 1.627        | 0.005        |
| 2                                 | 24273                  | 517072            | 305737           | 303395                            | 145600                           | 2152                                           | 52238                                         | 0.0482                 | 6E-4        | 1.629        | 0.005        |
| 3                                 | 24568                  | 517426            | 304387           | 303324                            | 143688                           | 2230                                           | 52146                                         | 0.0491                 | 6E-4        | 1.641        | 0.005        |
| <i>Weighted average of ratios</i> |                        |                   |                  |                                   |                                  |                                                |                                               | <b>0.0482</b>          | <b>4E-4</b> | <b>1.633</b> | <b>0.003</b> |

**Sample: Mogok 2A (uraninite)**

| Super crater #                    | <i>Measured Counts</i> |                   |                  |                                   |                                  |                                                |                                               | <i>Measured Ratios</i> |             |              |              |
|-----------------------------------|------------------------|-------------------|------------------|-----------------------------------|----------------------------------|------------------------------------------------|-----------------------------------------------|------------------------|-------------|--------------|--------------|
|                                   | <sup>206</sup> Pb      | <sup>232</sup> Th | <sup>238</sup> U | <sup>232</sup> Th <sup>16</sup> O | <sup>238</sup> U <sup>16</sup> O | <sup>232</sup> Th <sup>16</sup> O <sub>2</sub> | <sup>238</sup> U <sup>16</sup> O <sub>2</sub> | Pb/U                   | ±2σ         | Th/U         | ±2σ          |
| 1                                 | 6264                   | 493398            | 317625           | 311687                            | 165432                           | 2707                                           | 62002                                         | 0.0115                 | 3E-4        | 1.482        | 0.005        |
| 2                                 | 6479                   | 488538            | 317485           | 318125                            | 166445                           | 2736                                           | 61050                                         | 0.0119                 | 3E-4        | 1.485        | 0.005        |
| 3                                 | 6346                   | 529630            | 335358           | 325728                            | 163402                           | 2549                                           | 57256                                         | 0.0114                 | 3E-4        | 1.543        | 0.006        |
| <i>Weighted average of ratios</i> |                        |                   |                  |                                   |                                  |                                                |                                               | <b>0.0116</b>          | <b>2E-4</b> | <b>1.503</b> | <b>0.003</b> |

**Sample: Mogok 2C (uraninite)**

| Super crater #                    | <i>Measured Counts</i> |                   |                  |                                   |                                  |                                                |                                               | <i>Measured Ratios</i> |             |              |              |
|-----------------------------------|------------------------|-------------------|------------------|-----------------------------------|----------------------------------|------------------------------------------------|-----------------------------------------------|------------------------|-------------|--------------|--------------|
|                                   | <sup>206</sup> Pb      | <sup>232</sup> Th | <sup>238</sup> U | <sup>232</sup> Th <sup>16</sup> O | <sup>238</sup> U <sup>16</sup> O | <sup>232</sup> Th <sup>16</sup> O <sub>2</sub> | <sup>238</sup> U <sup>16</sup> O <sub>2</sub> | Pb/U                   | ±2σ         | Th/U         | ±2σ          |
| 1                                 | 7646                   | 539295            | 443682           | 269825                            | 204991                           | 1465                                           | 68656                                         | 0.0107                 | 2E-4        | 1.130        | 0.005        |
| 2                                 | 7101                   | 442467            | 398372           | 282723                            | 229631                           | 2039                                           | 88310                                         | 0.0099                 | 2E-4        | 1.015        | 0.004        |
| 3                                 | 7207                   | 458963            | 407723           | 273318                            | 224713                           | 2010                                           | 82944                                         | 0.0101                 | 2E-4        | 1.026        | 0.004        |
| <i>Weighted average of ratios</i> |                        |                   |                  |                                   |                                  |                                                |                                               | <b>0.0102</b>          | <b>1E-4</b> | <b>1.051</b> | <b>0.002</b> |

**Sample: Mogok 1 (thorite)**

| Super crater #                    | <i>Measured Counts</i> |                   |                  |                                   |                                  |                                                |                                               | <i>Measured Ratios</i> |             |               |             |
|-----------------------------------|------------------------|-------------------|------------------|-----------------------------------|----------------------------------|------------------------------------------------|-----------------------------------------------|------------------------|-------------|---------------|-------------|
|                                   | <sup>206</sup> Pb      | <sup>232</sup> Th | <sup>238</sup> U | <sup>232</sup> Th <sup>16</sup> O | <sup>238</sup> U <sup>16</sup> O | <sup>232</sup> Th <sup>16</sup> O <sub>2</sub> | <sup>238</sup> U <sup>16</sup> O <sub>2</sub> | Pb/U                   | ±2σ         | Th/U          | ±2σ         |
| 1                                 | 345                    | 19316             | 211434           | 22249                             | 241916                           | n/a                                            | 131263                                        | 0.00059                | 6E-5        | 0.071         | 0.001       |
| 2                                 | 305                    | 15162             | 167792           | 18895                             | 206792                           | n/a                                            | 123775                                        | 0.00061                | 7E-5        | 0.068         | 0.001       |
| 3                                 | 268                    | 15066             | 167220           | 19490                             | 207045                           | n/a                                            | 120478                                        | 0.00054                | 7E-5        | 0.070         | 0.001       |
| <i>Weighted average of ratios</i> |                        |                   |                  |                                   |                                  |                                                |                                               | <b>0.00058</b>         | <b>4E-5</b> | <b>0.0698</b> | <b>6E-4</b> |

**Table S3** Equations used for calculating the weighted average of the ratios. The equations below specifically represent calculations for  $^{206}\text{Pb}/^{238}\text{U}$  ratios. For  $^{232}\text{Th}/^{238}\text{U}$  ratio calculations,  $^{206}\text{Pb}$  is replaced with  $^{232}\text{Th}$  ion counts. Eqtns. (5) and (6) are bold and represent the final ratio values  $c$  and their uncertainty  $\sigma$ , respectively, reported in the main text.

|                  |                                                                                                                                                                                       |
|------------------|---------------------------------------------------------------------------------------------------------------------------------------------------------------------------------------|
| Eqtn. (1)        | $\text{Ratio} = a_n = \frac{[206\text{Pb (counts)}]}{[238\text{U (counts)}]}$                                                                                                         |
| Eqtn. (2)        | $\text{Ratio uncertainty} = \delta_n = \frac{[206\text{Pb (counts)}]}{[238\text{U (counts)}]} * \sqrt{\left(\frac{1}{206\text{Pb (counts)}} + \frac{1}{238\text{U (counts)}}\right)}$ |
| Eqtn. (3)        | $\text{Ratio weight} = b_n = \frac{\frac{[206\text{Pb (counts)}]}{[238\text{U (counts)}]}}{\delta_n^2}$                                                                               |
| Eqtn. (4)        | $\text{Ratio uncertainty weight} = \alpha_n = \frac{1}{\delta_n^2}$                                                                                                                   |
| <b>Eqtn. (5)</b> | $\text{Weighted average ratio} = c = \frac{\sum (b_1, b_2 \dots b_n)}{\sum (\alpha_1, \alpha_2, \dots \alpha_n)}$                                                                     |
| <b>Eqtn. (6)</b> | $\text{Weighted uncertainty of ratio} = \sigma = \sqrt{\frac{1}{\sum (\alpha_1, \alpha_2, \dots \alpha_n)}}$                                                                          |

Where  $n = 1, 2, 3, \dots, n+1$  and represents each ratio measured on the sample.



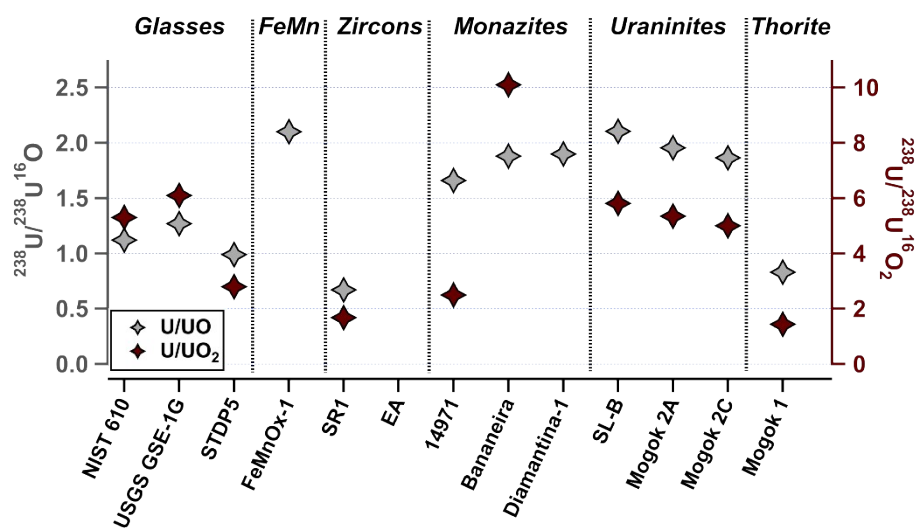

**Fig. S1**  $^{238}\text{U}/^{238}\text{U}^{16}\text{O}$  and  $^{238}\text{U}/^{238}\text{U}^{16}\text{O}_2$  ratios measured with the EUV TOF in the different matrices. Note that ratios are not shown for EA because  $^{238}\text{U}$  has a large interference in this sample.

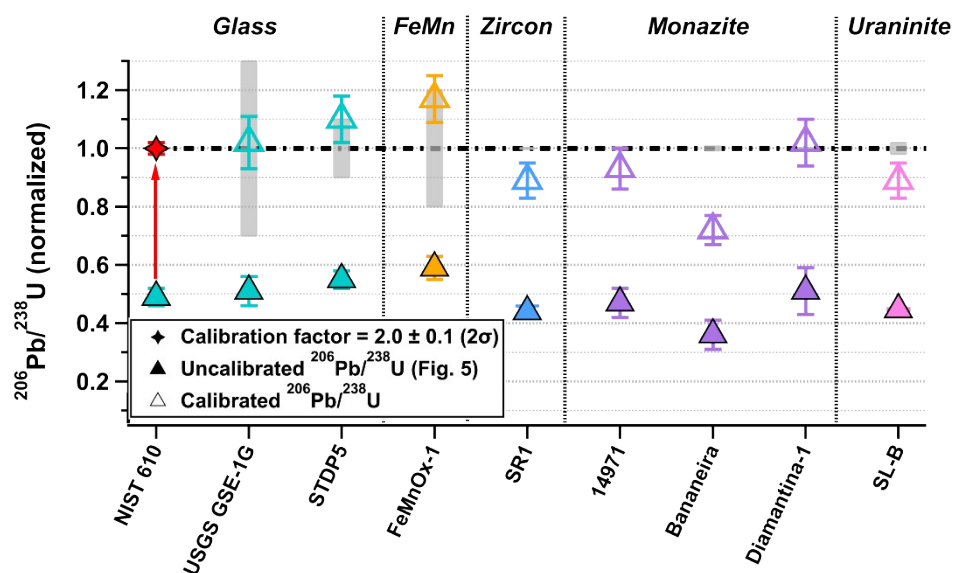

**Fig. S2** Uncalibrated and calibrated  $^{206}\text{Pb}/^{238}\text{U}$  ratios (normalized to 1) measured with the EUV TOF. The direct uncalibrated (i.e., raw)  $^{206}\text{Pb}/^{238}\text{U}$  ratios are from Fig. 5 and are shown as solid triangles. The open triangles represent calibrated  $^{206}\text{Pb}/^{238}\text{U}$  ratios using the NIST 610 CRM as the calibration standard, where the calibration factor is  $2.0 \pm 0.1$  ( $2\sigma$ ). The error bars on each point are  $\pm 2\sigma$ . The black dotted line represents the expected normalized ratios (i.e., 1). The gray bars are the corresponding  $\pm 2\sigma$  uncertainty for the expected ratios. The Mogok uraninites and thorite are not shown on this plot because they significantly deviate from the expected values by  $>50\%$  when the calibration factor is applied.

## References

1. C. Kaiyun, Y. Honglin, B. Zhian, Z. Chunlei and D. Mengning, *Geostand. Geoanalytical Res.*, 2013, **38**, 5-21.
2. I. Nikogosian, Ö. Ersoy, M. Whitehouse, P. R. D. Mason, J. C. M. de Hoog, R. Wortel and M. J. van Bergen, *Earth Planet. Sci. Lett.*, 2016, **449**, 12-19.
3. G. O. Goncalves, C. Lana, R. Scholz, I. S. Buick, A. Gerdes, S. L. Kamo, F. Corfu, M. M. Marinho, A. O. Chaves, C. Valeriano and H. A. Nalini Jr., *Chem. Geol.*, 2016, **424**, 30-50.
4. G. O. Goncalves, C. Lana, R. Scholz, I. S. Buick, A. Gerdes, S. L. Kamo, F. Corfu, D. Rubatto, M. Wiedenbeck, H. A. Nalini Jr. and L. C. A. Oliveira, *Geostand. Geoanalytical Res.*, 2017, **42**, 25-47.
